# Supplementary material for: Spinel ferrites MFe2O4 (M = Co, Cu, Zn) for photocatalysis: theoretical and experimental insights
Source: Royal Society of Chemistry journal article supplement (doi:10.1039/d4ta04941a), 2024-01-01
Supplement: d4ta04941a1.pdf [file d4ta04941a1.pdf]

# Spinel ferrites $MFe_2O_4$ ( $M = Co, Cu, Zn$ ) for photocatalysis: theoretical and experimental insights

## Supplementary Information

Charlotte Hall,<sup>1,2</sup> Pilar Ferrer,<sup>2\*</sup> David C. Grinter,<sup>2</sup> Santosh Kumar,<sup>2</sup> Ivan da Silva,<sup>3</sup> Juan Rubio-Zuazo,<sup>4,5</sup> Peter Bencok,<sup>2</sup> Frank de Groot,<sup>6</sup> Georg Held,<sup>2</sup> Ricardo Grau-Crespo<sup>1\*</sup>

<sup>1</sup> Department of Chemistry, University of Reading, Whiteknights, Reading RG6 6DX, United Kingdom.

<sup>2</sup> Diamond Light Source, Harwell Science and Innovation Campus, Didcot OX11 0DE, United Kingdom.

<sup>3</sup> ISIS Neutron and Muon Source, STFC, Rutherford Appleton Laboratory, Didcot, OX11 0QX, United Kingdom.

<sup>4</sup>European Synchrotron Radiation Facility, CS40220, F-38043 Grenoble Cedex 9, France.

<sup>5</sup> ICMM-CSIC, Sor Juana Inés de la Cruz 3, Cantoblanco, Madrid, Spain.

<sup>6</sup> Debye Institute for Nanomaterials Science, Utrecht University, 3584 CA Utrecht, The Netherlands.

\*Corresponding authors' email: [pilar.ferrer-escorihuela@diamond.ac.uk](mailto:pilar.ferrer-escorihuela@diamond.ac.uk); [r.grau-crespo@reading.ac.uk](mailto:r.grau-crespo@reading.ac.uk)

### 1. Normalisation Procedure

#### *NEXAFS*

The spectra were normalised to the beamline transmission by subtracting the  $I_0$  measurement. The background and edge jumps were subtracted with a Fermi-Dirac step function. Two step functions with a width of 7 eV<sup>1</sup> were used with a 2:1 jump ratio for the  $L_3$  and  $L_2$  edges respectively. The edge jump position was shifted by 3 eV with respect to the peak maximum.<sup>2</sup> Finally, the integral of each spectrum was normalised with respect to the average number of holes, 4.8 (20%  $Fe^{2+}$  and 80%  $Fe^{3+}$  as determined by the XMCD fitting).

#### *XMCD*

The positive and negative circularly polarised XAS spectra measured were first normalised with respect to the beamline transmission and then normalised to the pre-edge region. The difference in these normalised spectra was taken to obtain the XMCD signals.

## 2. Anomalous X-Ray Scattering (AXRS) patterns

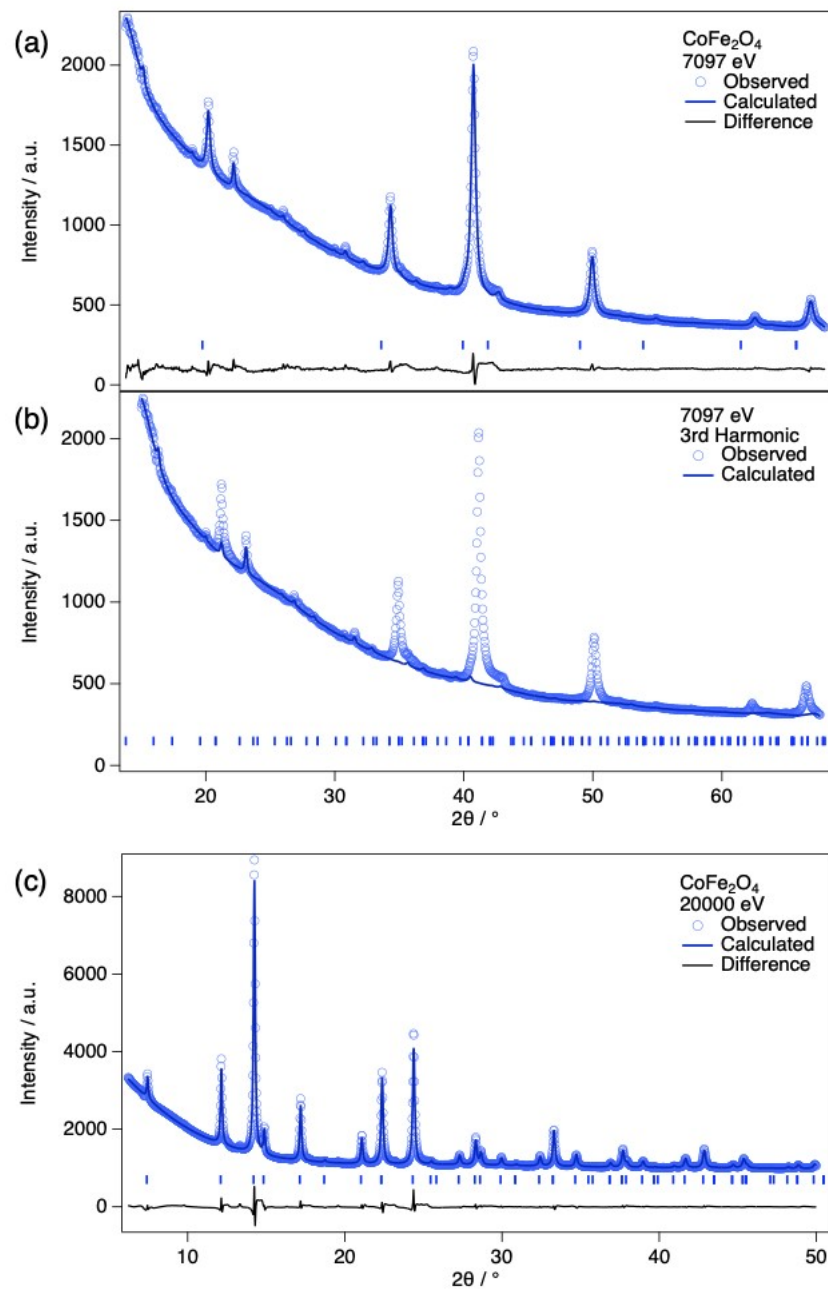

Supplementary Figure 1. AXRS patterns of CoFe<sub>2</sub>O<sub>4</sub> at 7097 eV (a) and (b) (only 3<sup>rd</sup> harmonic contribution) and at 2000 eV (c)

### 3. X-Ray diffraction (XRD) patterns

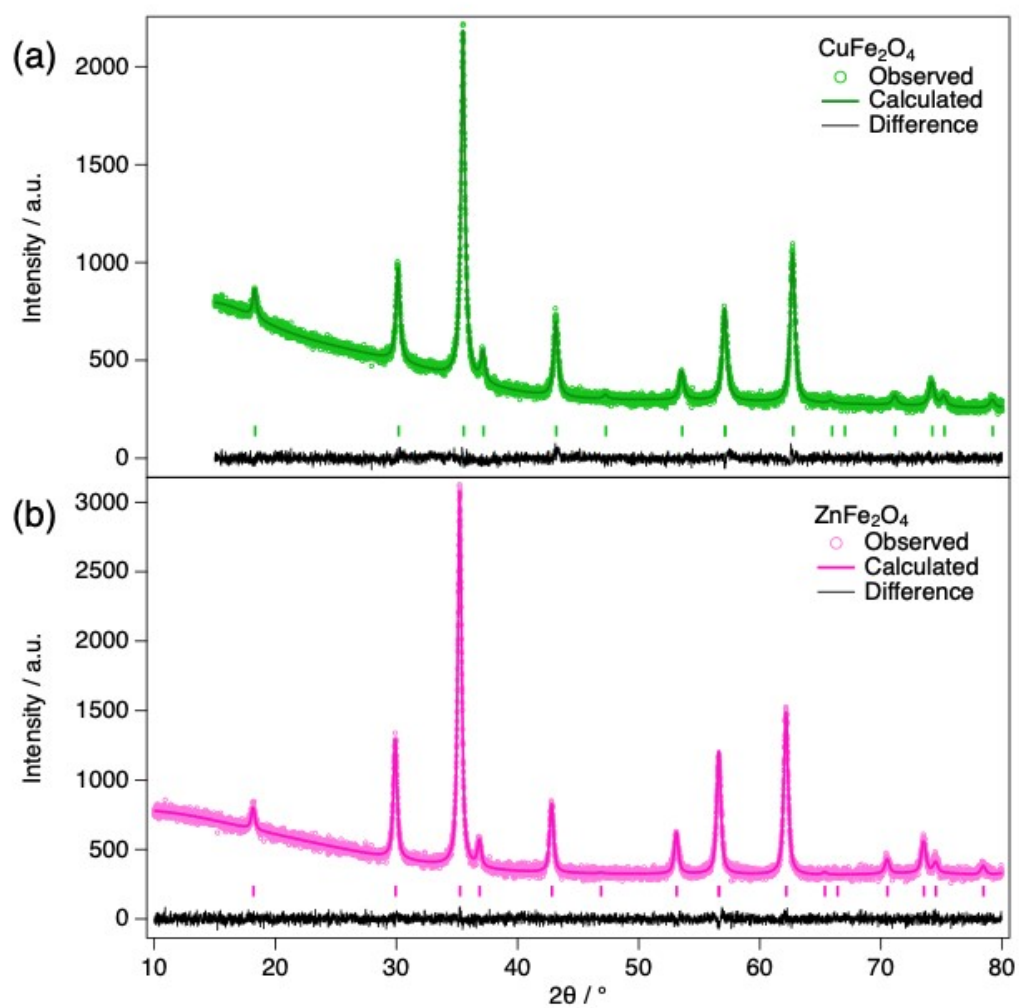

Supplementary Figure 2. XRD of a)  $\text{CuFe}_2\text{O}_4$  and b)  $\text{ZnFe}_2\text{O}_4$

#### 4. Catalytic testing control experiments

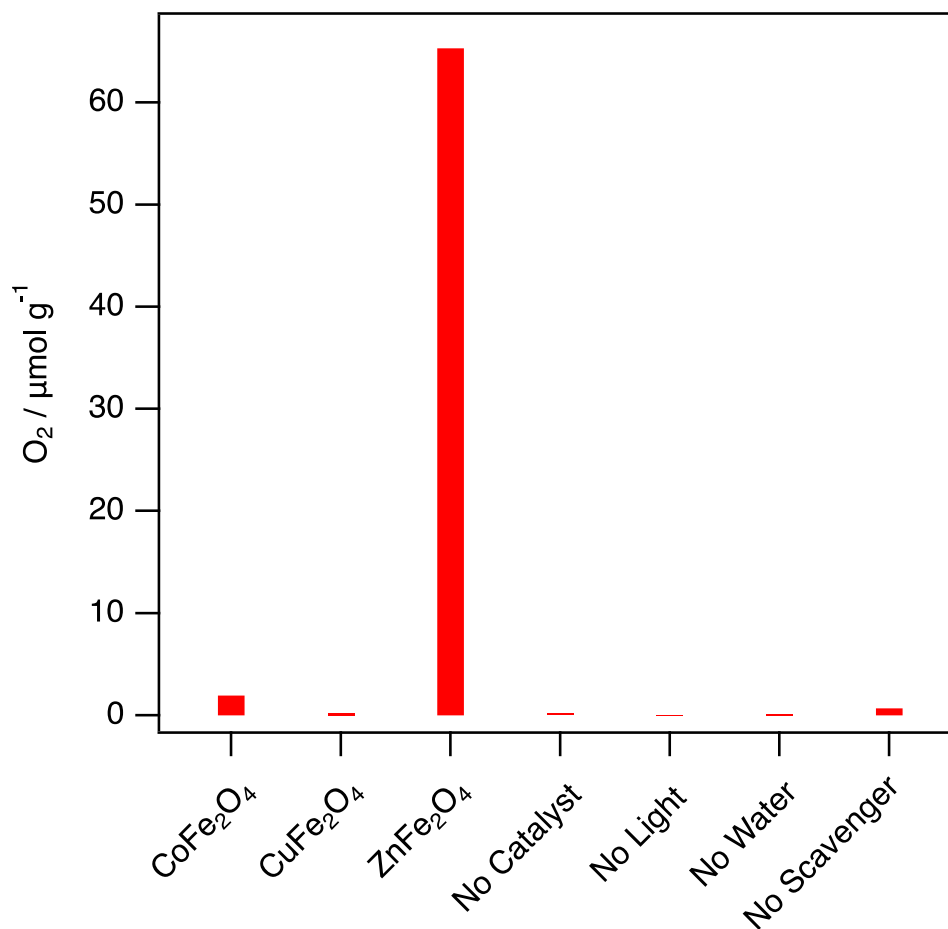

**Supplementary Figure 3.** The amount of oxygen produced by the spinels MFe<sub>2</sub>O<sub>4</sub> (M = Co, Cu or Zn) under the photocatalytic conditions outlined in section 2.4 of the article, and the oxygen produced by the control measurements: with no catalyst, or with ZnFe<sub>2</sub>O<sub>4</sub> catalyst but no UV light, no water or no Ag<sup>+</sup> sacrificial agent (scavenger).

#### 5. Calculated band structure

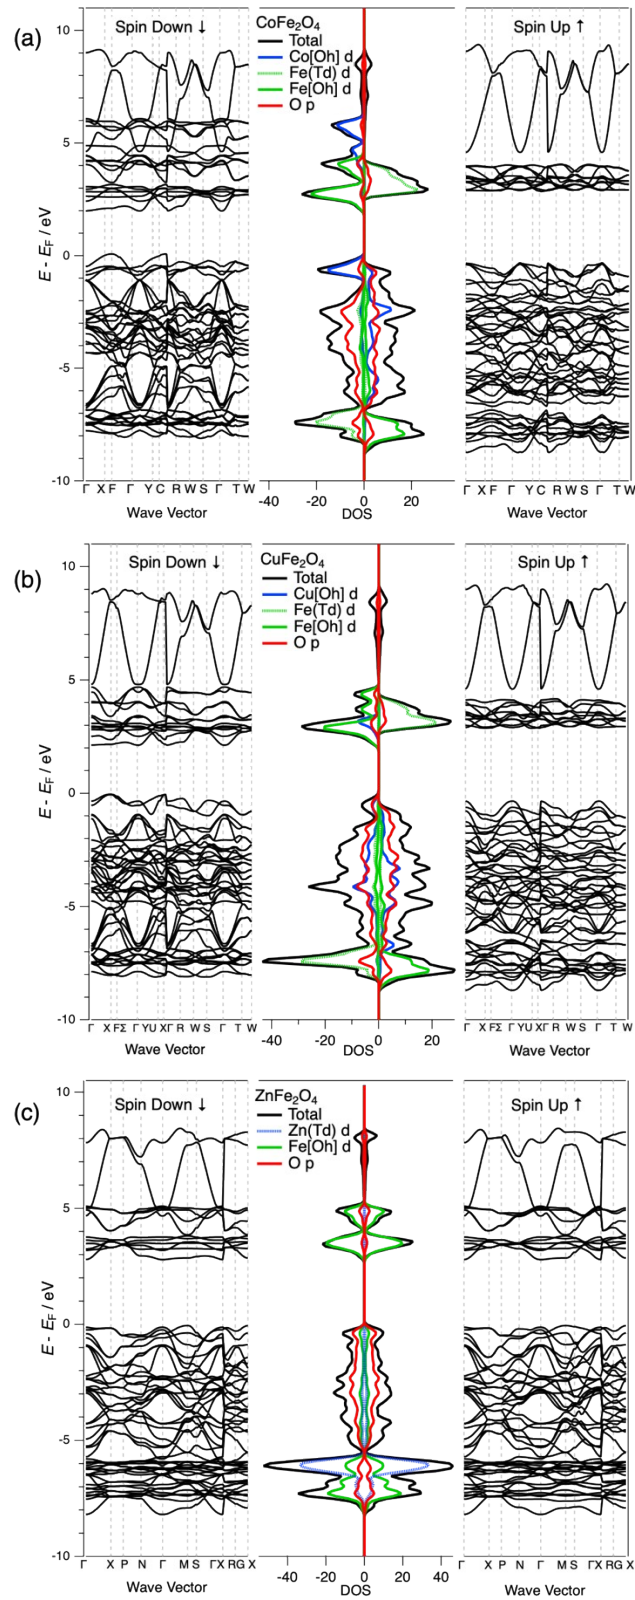

**Supplementary Figure 4. Band structure calculated at HSE06 level for a) CoFe<sub>2</sub>O<sub>4</sub>, b) CuFe<sub>2</sub>O<sub>4</sub> and c) ZnFe<sub>2</sub>O<sub>4</sub>.**

## 6. Details of surface slabs

To build stoichiometric and non-polar surface models the surface must be reconstructed. The schematic for how each surface is terminated and their respective notations can be seen in **Supplementary Figure 4**. The opposite surfaces of each slab have the same, symmetric terminations. The notation used for these surfaces follows that used in Ref. <sup>3</sup>.

The (100)<sub>A</sub> surface is Zn-terminated, whereas the (100)<sub>B</sub> surface ends at the Fe-O layer, with half of the layer atoms removed.

The (111) surfaces are Fe-terminated. Building the (111) surfaces requires the unit cell to be expanded in both lateral directions, which leads to the two different types of bulk Fe layers having six and one Fe atoms per cell, respectively. The (111)<sub>A</sub> surface ends at the Fe<sub>6</sub> layer, but half of the surface atoms are removed (Fe<sub>3</sub> termination). The (111)<sub>B</sub> surface ends at the Fe<sub>2</sub> layer, and again half of the Fe atoms are removed to maintain the stoichiometry (Fe termination).

|                                   |                                   |                                   |
|-----------------------------------|-----------------------------------|-----------------------------------|
| Bulk                              | (100) <sub>A</sub>                | (100) <sub>B</sub>                |
| ⋮                                 | Zn                                | Fe <sub>2</sub> -- O <sub>4</sub> |
| Zn <sub>2</sub>                   | Fe <sub>4</sub> -- O <sub>8</sub> | Zn <sub>2</sub>                   |
| Fe <sub>4</sub> -- O <sub>8</sub> | Zn <sub>2</sub>                   | Fe <sub>4</sub> -- O <sub>8</sub> |
| Zn <sub>2</sub>                   | Fe <sub>4</sub> -- O <sub>8</sub> | Zn <sub>2</sub>                   |
| Fe <sub>4</sub> -- O <sub>8</sub> | Zn <sub>2</sub>                   | Fe <sub>4</sub> -- O <sub>8</sub> |
| Zn <sub>2</sub>                   | Fe <sub>4</sub> -- O <sub>8</sub> | Zn <sub>2</sub>                   |
| Fe <sub>4</sub> -- O <sub>8</sub> | Zn <sub>2</sub>                   | Fe <sub>4</sub> -- O <sub>8</sub> |
| Zn <sub>2</sub>                   | Fe <sub>4</sub> -- O <sub>8</sub> | Zn <sub>2</sub>                   |
| Fe <sub>4</sub> -- O <sub>8</sub> | Zn <sub>2</sub>                   | Fe <sub>4</sub> -- O <sub>8</sub> |
| Zn <sub>2</sub>                   | Fe <sub>4</sub> -- O <sub>8</sub> | Zn                                |
| Fe <sub>4</sub> -- O <sub>8</sub> | Zn                                | Fe <sub>2</sub> -- O <sub>4</sub> |
| ⋮                                 |                                   |                                   |
| Bulk                              | (111) <sub>A</sub>                | (111) <sub>B</sub>                |
| ⋮                                 | Fe <sub>3</sub>                   | Fe                                |
| O <sub>4</sub>                    | O <sub>8</sub>                    | Zn <sub>2</sub>                   |
| Fe <sub>3</sub>                   | Zn <sub>2</sub>                   | O <sub>8</sub>                    |
| O <sub>4</sub>                    | Fe <sub>2</sub>                   | Fe <sub>6</sub>                   |
| Zn                                | Zn <sub>2</sub>                   | O <sub>8</sub>                    |
| Fe                                | O <sub>8</sub>                    | Zn <sub>2</sub>                   |
| Zn                                | Fe <sub>6</sub>                   | Fe <sub>2</sub>                   |
| O <sub>4</sub>                    | O <sub>8</sub>                    | Zn <sub>2</sub>                   |
| Fe <sub>3</sub>                   | Zn <sub>2</sub>                   | O <sub>8</sub>                    |
| O <sub>4</sub>                    | Fe <sub>2</sub>                   | Fe <sub>6</sub>                   |
| Zn                                | Zn <sub>2</sub>                   | O <sub>8</sub>                    |
| Fe                                | O <sub>8</sub>                    | Zn <sub>2</sub>                   |
| Zn                                | Fe <sub>3</sub>                   | Fe                                |
| ⋮                                 |                                   |                                   |

**Supplementary Figure 5. Schematic representation of the ZnFe<sub>2</sub>O<sub>4</sub> (100) and (111) surface reconstructions. The column of the left shows the sequence of layers in the bulk for the given direction; the shaded rectangles in the bulk scheme highlight a stoichiometric unit.**

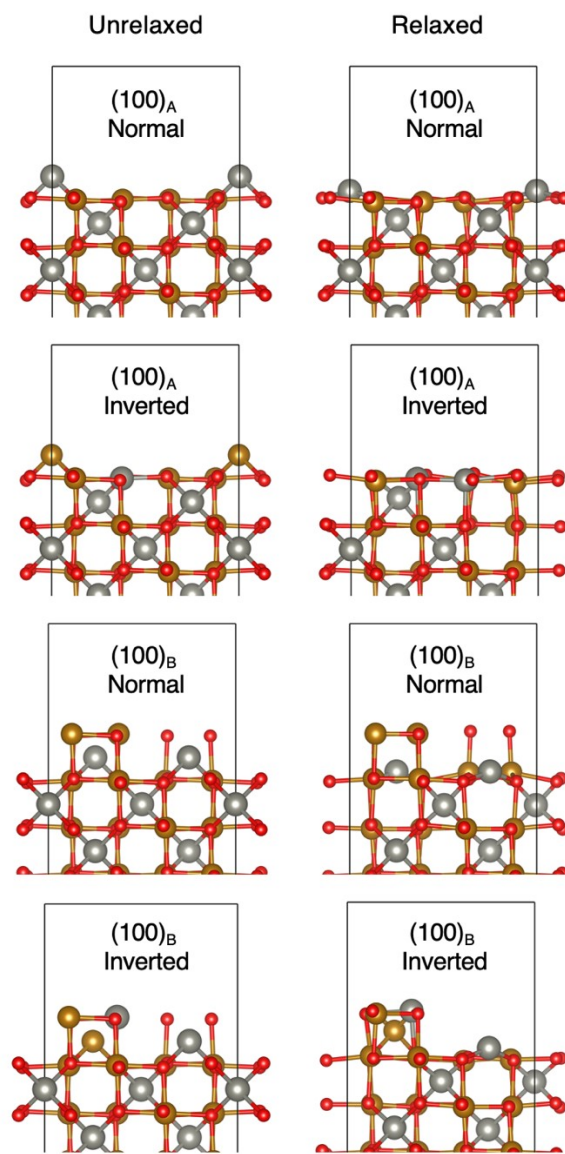

**Supplementary Figure 6. ZnFe<sub>2</sub>O<sub>4</sub> (100) A and B terminated surfaces before and after relaxation. Colour scheme: Zn = silver; Fe = gold; oxygen = red.**

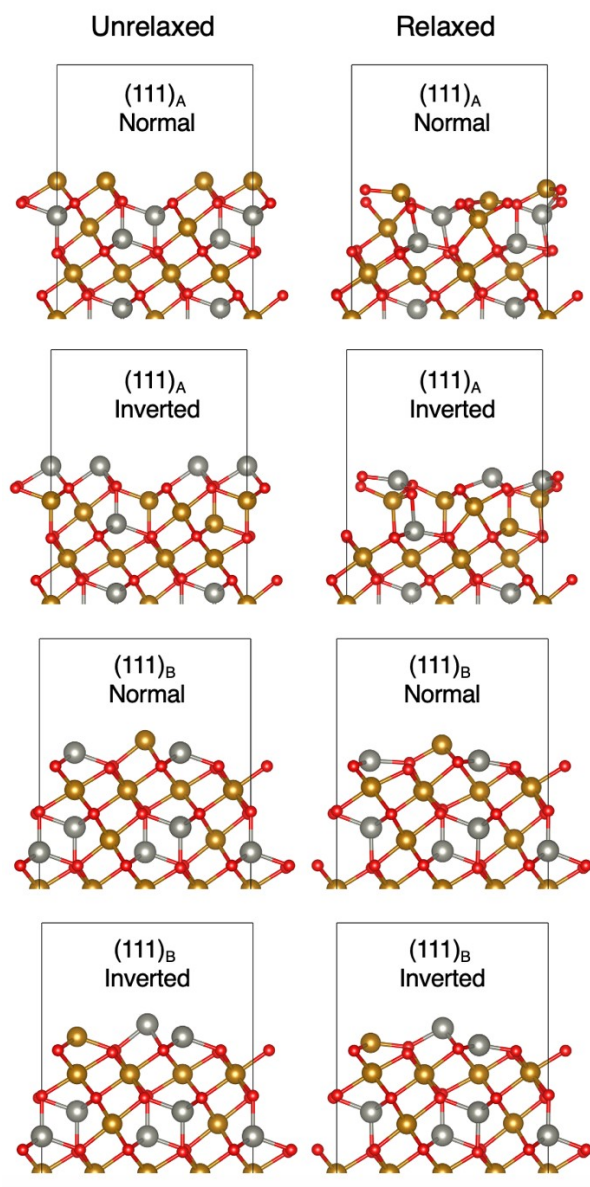

**Supplementary Figure 7.  $\text{ZnFe}_2\text{O}_4$  (111) A and B terminated surfaces before and after relaxation. Colour scheme: Zn = silver; Fe = gold; oxygen = red.**



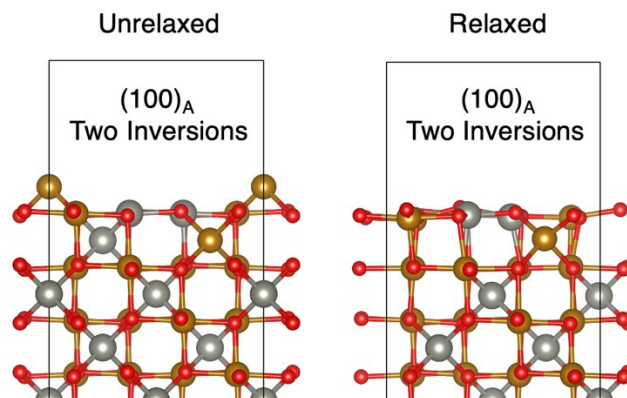

**Supplementary Figure 8.**  $\text{ZnFe}_2\text{O}_4$   $(100)_A$  surfaces with two cation pairs inverted before and after relaxation. Colour scheme: Zn = silver; Fe = gold; oxygen = red.

## 7. Fitted XMCD percentages

**Supplementary Table 1.** Percentages of Fe cations in different oxidation states ( $\text{Fe}^{2+}/\text{Fe}^{3+}$ ) and sites (Oh/Td) at the spinel near-surfaces, as derived from the XMCD fitting.

| Sample                    | $\text{Fe}^{3+}$ Oh | $\text{Fe}^{3+}$ Td | $\text{Fe}^{2+}$ Oh |
|---------------------------|---------------------|---------------------|---------------------|
| $\text{CoFe}_2\text{O}_4$ | 42.9%               | 38.1%               | 19.0%               |
| $\text{CuFe}_2\text{O}_4$ | 44.5%               | 37.2%               | 18.3%               |
| $\text{ZnFe}_2\text{O}_4$ | 46.8%               | 25.1%               | 28.1%               |

## References

1. M. Ghiasi, A. Hariki, M. Winder, J. Kuneš, A. Regoutz, T.-L. Lee, Y. Hu, J.-P. Rueff and F. M. F. de Groot, *Physical Review B*, 2019, **100**.
2. G. Van Der Laan, J. Zaanen and G. A. Sawatzky, *Physical Review B*, 1986, **33**, 4253-4263.
3. D. Santos-Carballal, A. Roldan, R. Grau-Crespo and N. H. de Leeuw, *Phys Chem Chem Phys*, 2014, **16**, 21082-21097.
